# Supplementary material
Source: Springer Nature journal article supplement (https://www.springermedizin.de/resource/supplementary/13054_2010_8499_MOESM2_ESM.pdf/9732108)
Supplement: MOESM2 [file 9732108]

Inclusion of eligible patient and admission to OR  
Randomization to Vigileo or Control group  
Obtaining baseline physiologic variables

Insertion of arterial catheter before induction of anesthesia,  
Setting the Vigileo/FloTrac machine  
Baseline blood samples,  
Induction, mandatory ventilation (Vt 8ml/kg, PEEP 0.6 kPa)

Measure and record SVV, CI

SVV  $\geq$  10%  
and CVP < 15 mmHg

Yes

Colloid bolus 3ml/kg over  
5 minutes

SVV < 10% and  
no change or decrease of CI

Repeat monitoring of SVV, CI during next 5  
minutes

No

CVP rise  $\leq$  3 mmHg

SVV  $\geq$  10% or  
Increase of CI > 10%

Dobutamine infusion to  
reach CI  $\geq$  2,5 l/min/m<sup>2</sup>

Yes

CI < 2,5 l/min/m<sup>2</sup>

No
